# Supplementary material
Source: Springer Nature journal article supplement (https://www.springermedizin.de/resource/supplementary/12890_2012_352_MOESM2_ESM.pdf/9504982)
Supplement: MOESM2 [file 9504982]

|           | Predicted | Jul-11 | Oct-11 | Jan-12 |
|-----------|-----------|--------|--------|--------|
| FVC (L)   | 4.95      | 3.94   | 2.88   | 3.38   |
| FEV1 (L)  | 4.11      | 2.32   | 1.39   | 1.90   |
| FEV1%     | 80.90     | 58.90  | 48.40  | 56.30  |
| PEF (L/s) | 9.51      | 5.03   | 3.35   | 6.00   |
